# Supplementary material for: Walking the Line: A Fibronectin Fiber-Guided Assay to Probe Early Steps of (Lymph)angiogenesis
Source: PLOS journal article supplement (doi:10.1371/journal.pone.0145210), 2015-12-21
Supplement: S1 (10.1371/journal.pone.0145210.s001) [file journal.pone.0145210.s001]

### Event tree for multiple outgrowth events coming from one bead
