# Supplementary material for: Walking the Line: A Fibronectin Fiber-Guided Assay to Probe Early Steps of (Lymph)angiogenesis
Source: PLOS journal article supplement (doi:10.1371/journal.pone.0145210), 2015-12-21

suppl. Figure 3

A

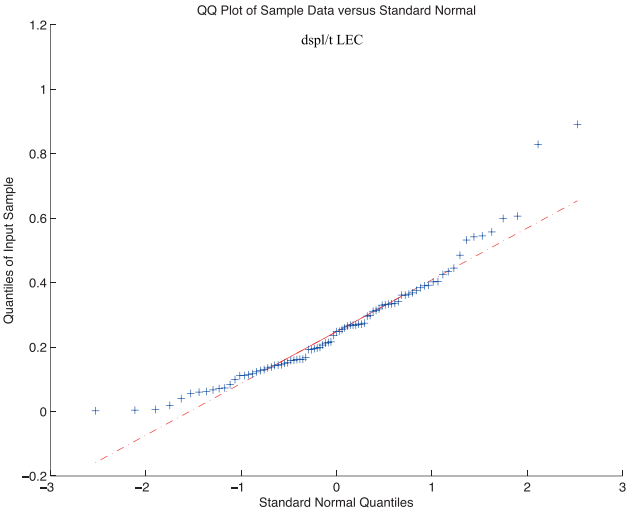

B

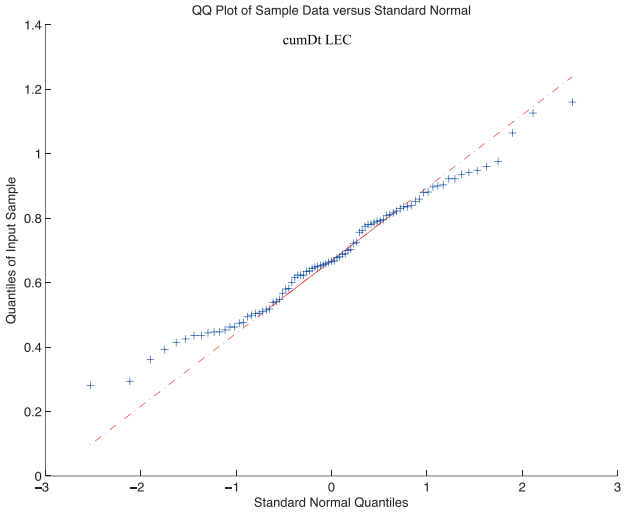

C

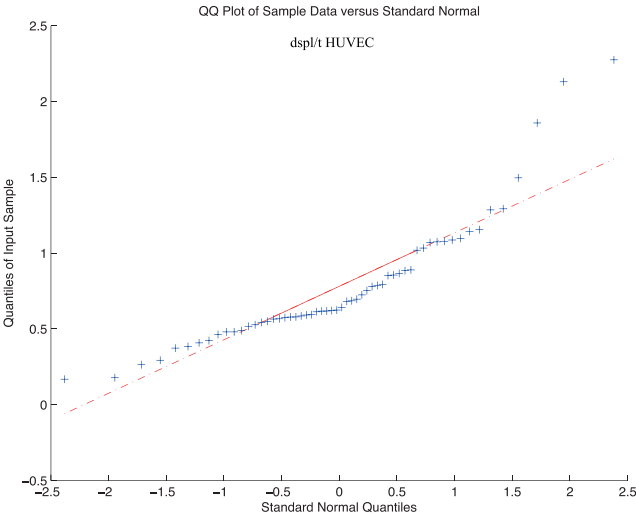

D

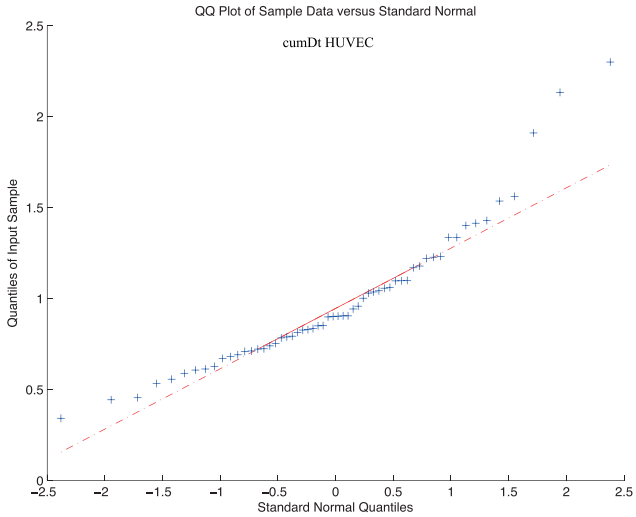

Supplement: S3 (10.1371/journal.pone.0145210.s003) [file journal.pone.0145210.s003]
