# Supplementary material for: Walking the Line: A Fibronectin Fiber-Guided Assay to Probe Early Steps of (Lymph)angiogenesis
Source: PLOS journal article supplement (doi:10.1371/journal.pone.0145210), 2015-12-21

suppl. Figure 7

A

Linear regression model (robust fit) for  $dspI/t$

$y \sim 1 + x$

y: response variable ( $dspI/t$ )

x: predictor categorical variable with 3 levels (control, VEGF-A and VEGF-A+VEGF-C)

Estimated coefficients:

|           | Estimate | SE       | tStat   | pValue     |
|-----------|----------|----------|---------|------------|
| Intercept | 0.91951  | 0.061376 | 14.982  | 4.59E-21   |
| x         | -0.33827 | 0.08392  | -4.0308 | 0.00017248 |

Number of observations: 58, Error degrees of freedom: 55

Root Mean Squared Error: 0.274

R-squared: 0.322, Adjusted R-Squared 0.298

F-statistic vs. constant model: 13.1, p-value = 2.26e-05

B

Linear regression model (robust fit) for  $cumD/t$

$y \sim 1 + x$

y: response variable ( $cumD/t$ )

x: predictor categorical variable with 3 levels (control, VEGF-A and VEGF-A+VEGF-C)

Estimated coefficients:

|           | Estimate | SE       | tStat   | pValue    |
|-----------|----------|----------|---------|-----------|
| Intercept | 1.1263   | 0.066193 | 17.016  | 1.42E-23  |
| x         | -0.29446 | 0.090506 | -3.2535 | 0.0019514 |

Number of observations: 58, Error degrees of freedom: 55

Root Mean Squared Error: 0.296

R-squared: 0.235, Adjusted R-Squared 0.207

F-statistic vs. constant model: 8.46, p-value = 0.000626

C

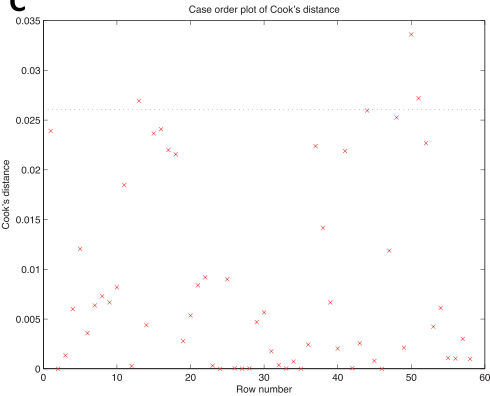

D

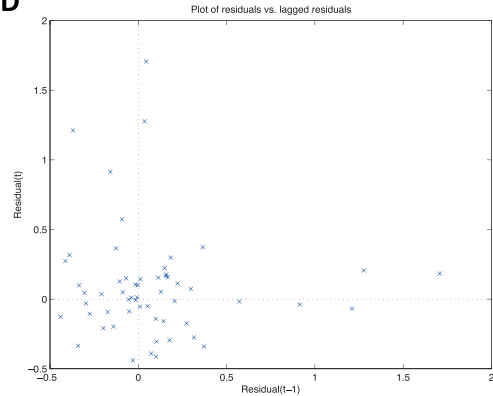

E

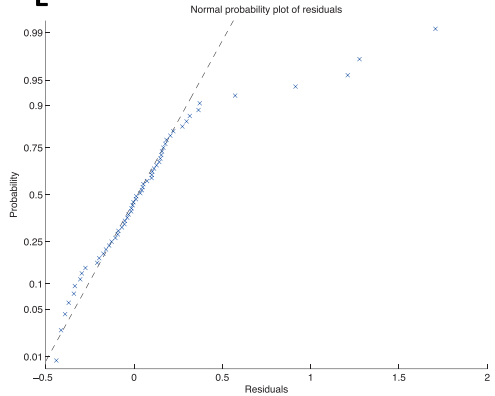

F

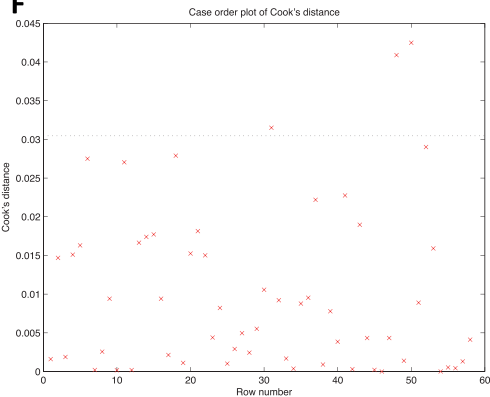

G

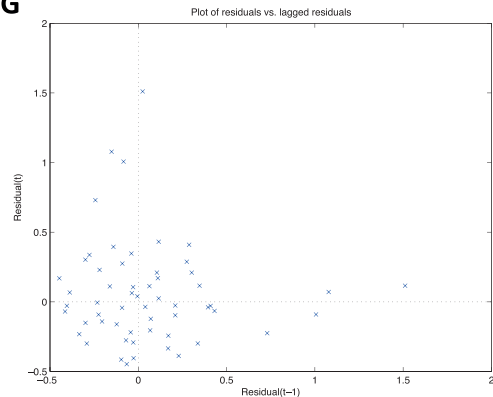

H

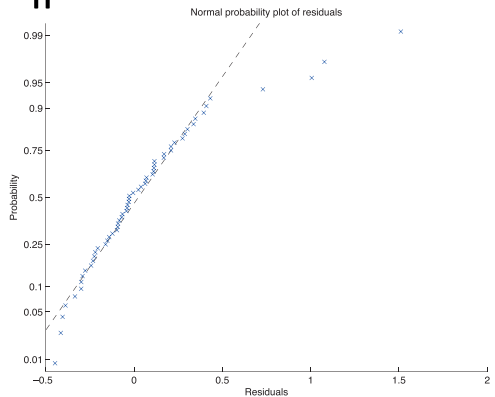

Supplement: S7 (10.1371/journal.pone.0145210.s007) [file journal.pone.0145210.s007]
